# Supplementary material
Source: MDPI journal article supplement (https://www.mdpi.com/2073-4344/12/4/394)
Supplement: s1 [file s1]

## **SUPPORTING INFORMATION**

### **Highly Efficient Asymmetric Morita-Baylis-Hillman Reaction Promoted by Chiral Aziridine-Phosphines**

A. Buchcic-Szychowska, A. Zawisza, S. Leśniak, M. Rachwalski \*

Department of Organic and Applied Chemistry, University of Łódź, Tamka 12,  
91-403 Łódź, Poland

#### **List of contents**

|                                                            |               |
|------------------------------------------------------------|---------------|
| <b>1. <math>^1\text{H}</math> NMR of MBH products-----</b> | <b>S2-S4</b>  |
| <b>2. HPLC chromatograms of MBH products-----</b>          | <b>S5-S14</b> |

# 1. $^1\text{H}$ NMR of MBH products

## (S)-3-(hydroxy(4-nitrophenyl)methyl)but-3-en-2-one **11**

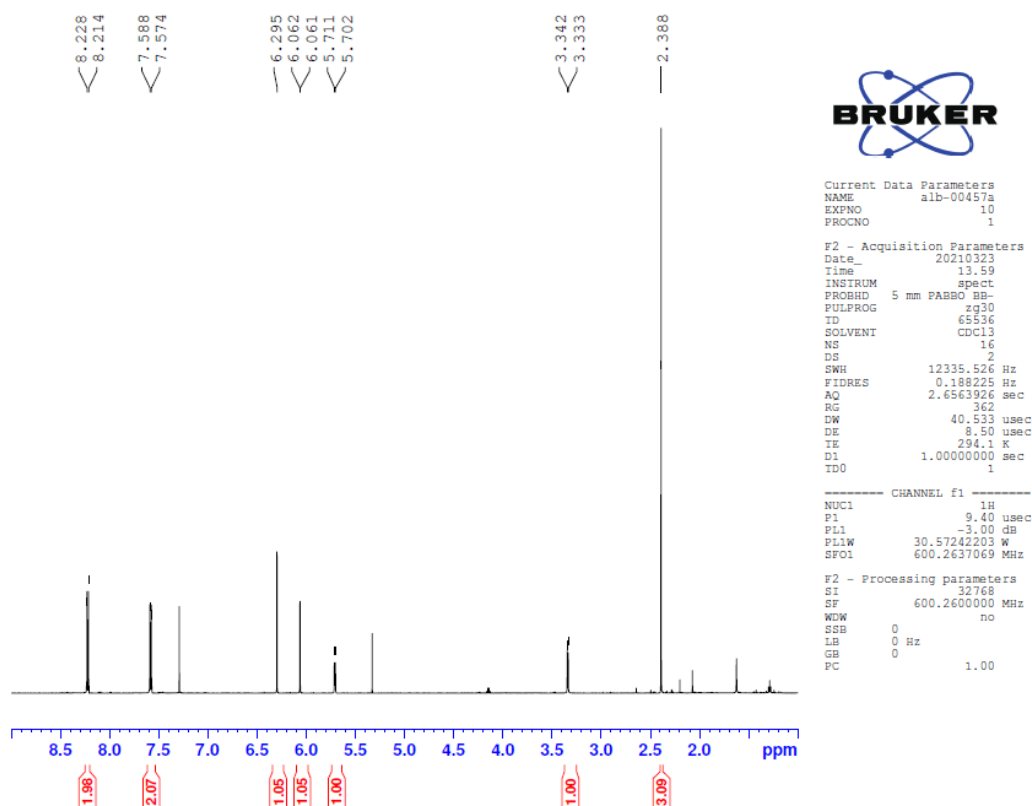

## (S)-3-(hydroxyphenyl)methyl)but-3-en-2-one **12**

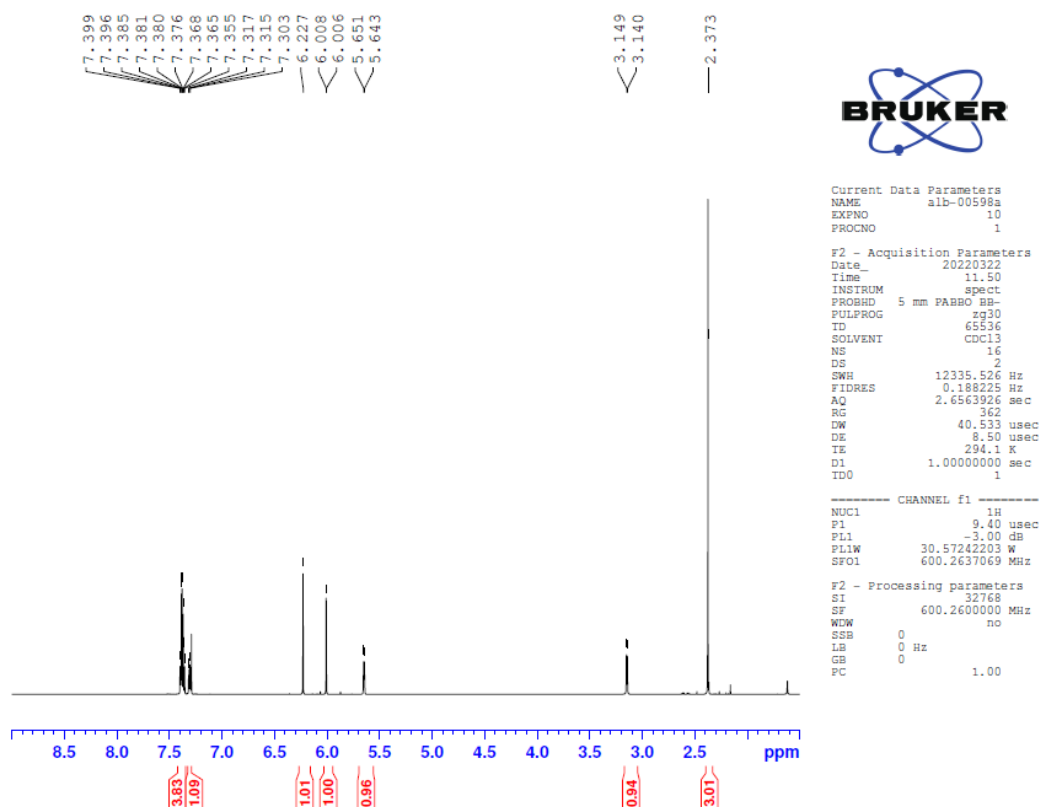

(S)-3-(hydroxy(naphthalene-2-yl)methyl)but-3-en-2-one **13**

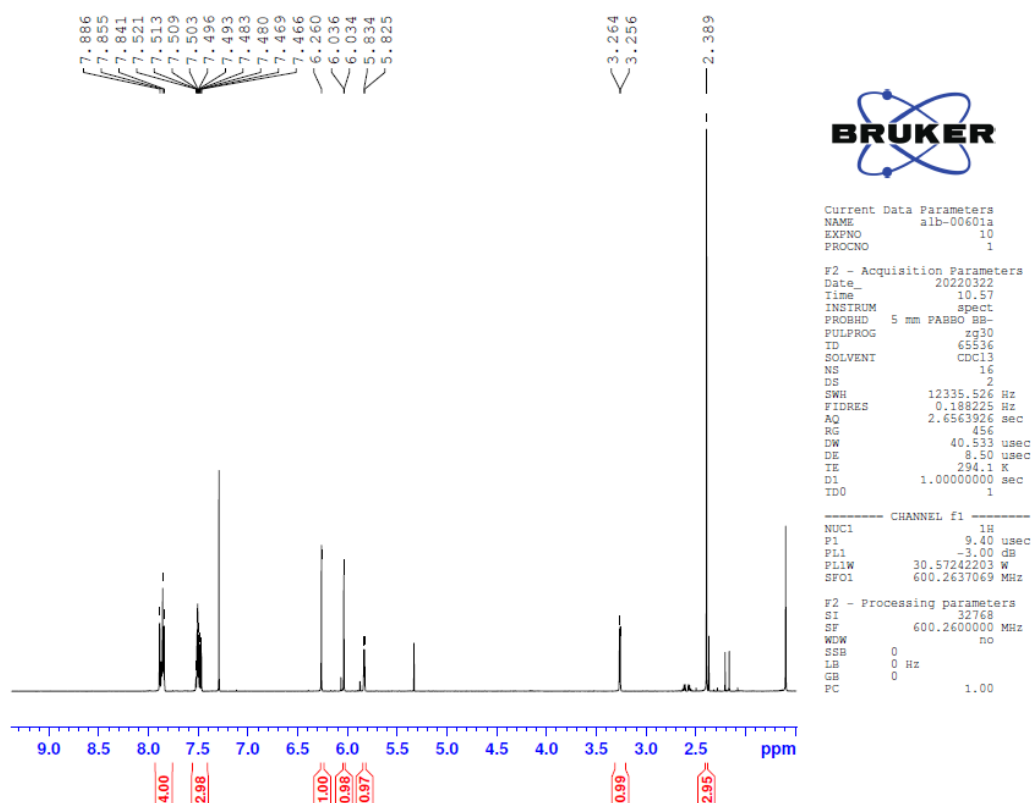

(S)-3-(hydroxy(4-fluorophenyl)methyl)but-3-en-2-one **14**

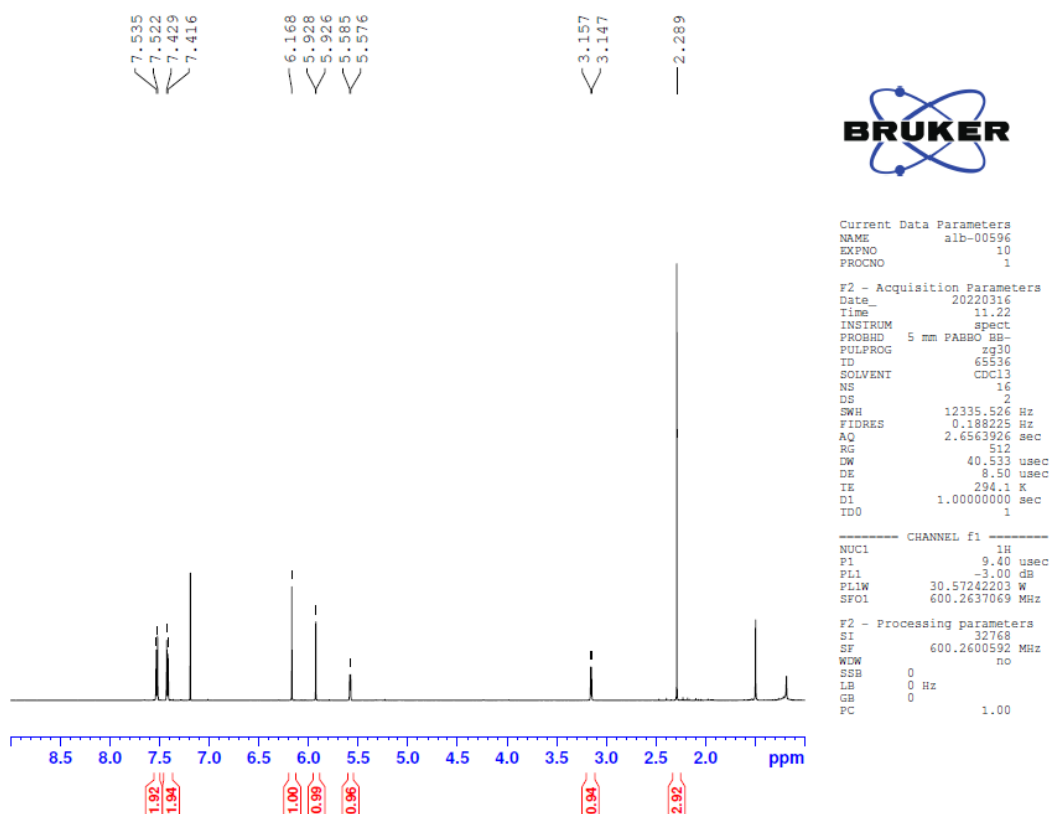

(S)-3-(hydroxy(4-bromophenyl)methyl)but-3-en-2-one **15**

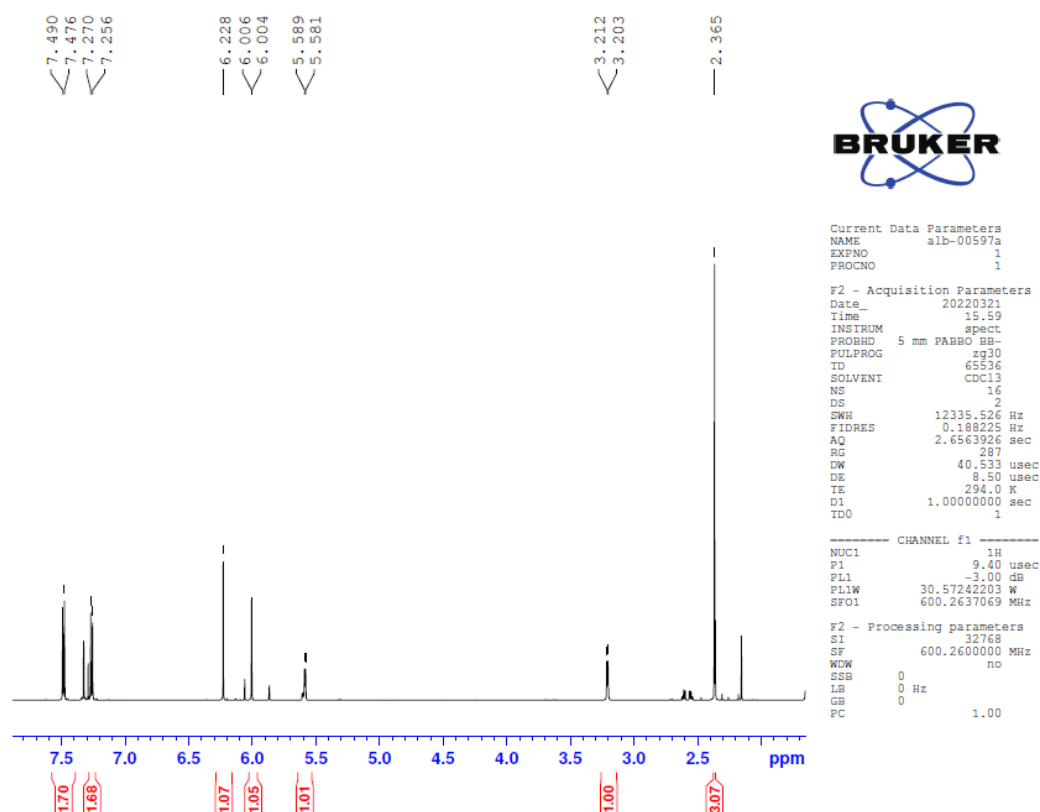

Methyl (S)-2-(hydroxy(4-nitrophenyl)methyl) acrylate **17**

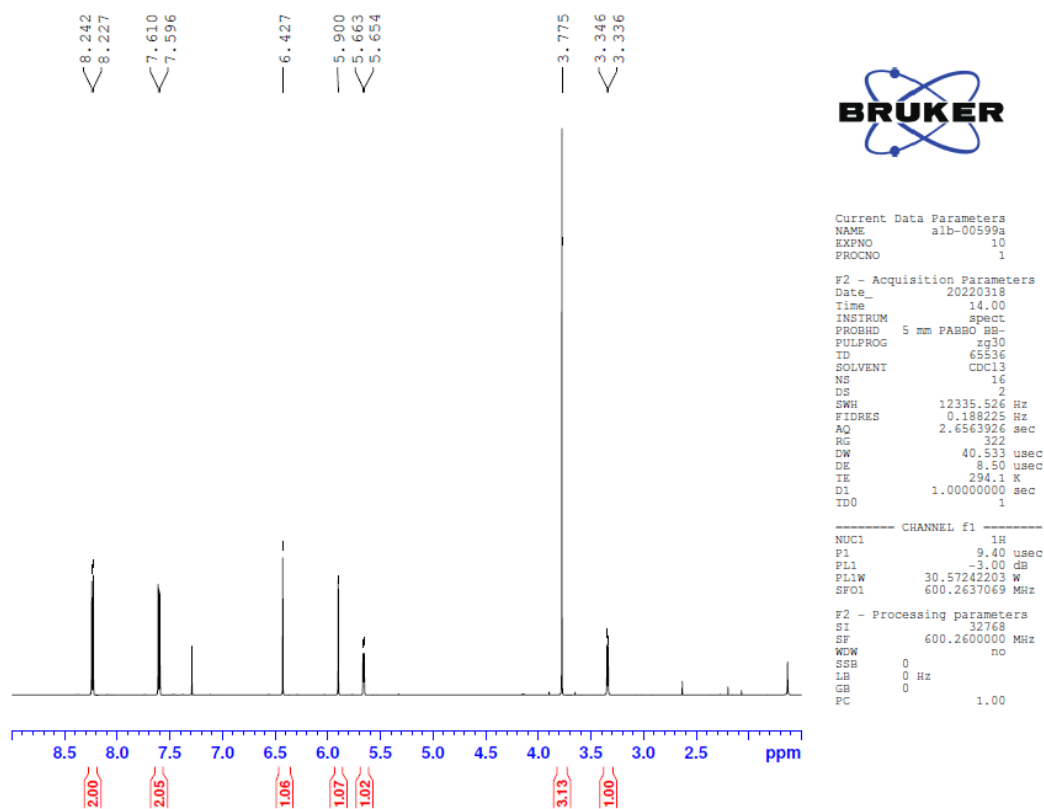

## 2. HPLC chromatograms of MBH products

### (S)-3-(hydroxy(4-nitrophenyl)methyl)but-3-en-2-one 11

*ee* (98%) determined by HPLC analysis: Chiralcel OD-H column, Hexane : *i*PrOH = 90:10, flow = 1.0 mL/min, retention times (min): 20.80 (minor), 23.63 (major). For the racemic sample times were slightly higher: 21.87 and 24.30 min., respectively.

#### Racemic

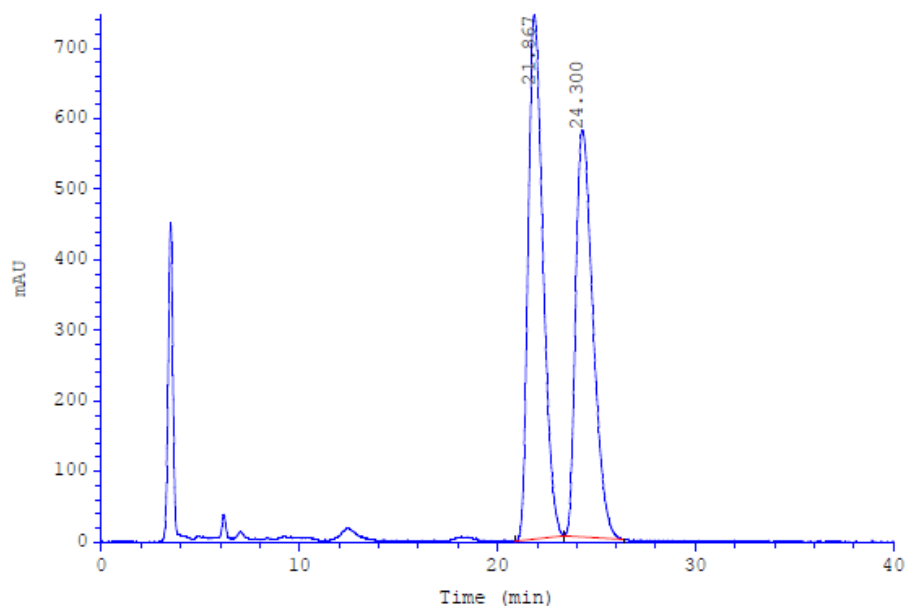

|   | Ret.time<br>[min] | Start<br>[min] | End<br>[min] | Compound | Amount | Units | Area<br>[mAU*min] | Height<br>[mAU] | % Area  | Width<br>[min] | Type |
|---|-------------------|----------------|--------------|----------|--------|-------|-------------------|-----------------|---------|----------------|------|
| 1 | 21.867            | 20.90          | 23.37        |          | 0      |       | 644.098           | 743.176         | 52.5334 | 0.813          | BB   |
| 2 | 24.300            | 23.37          | 26.38        |          | 0      |       | 581.976           | 576.865         | 47.4666 | 0.945          | BB   |

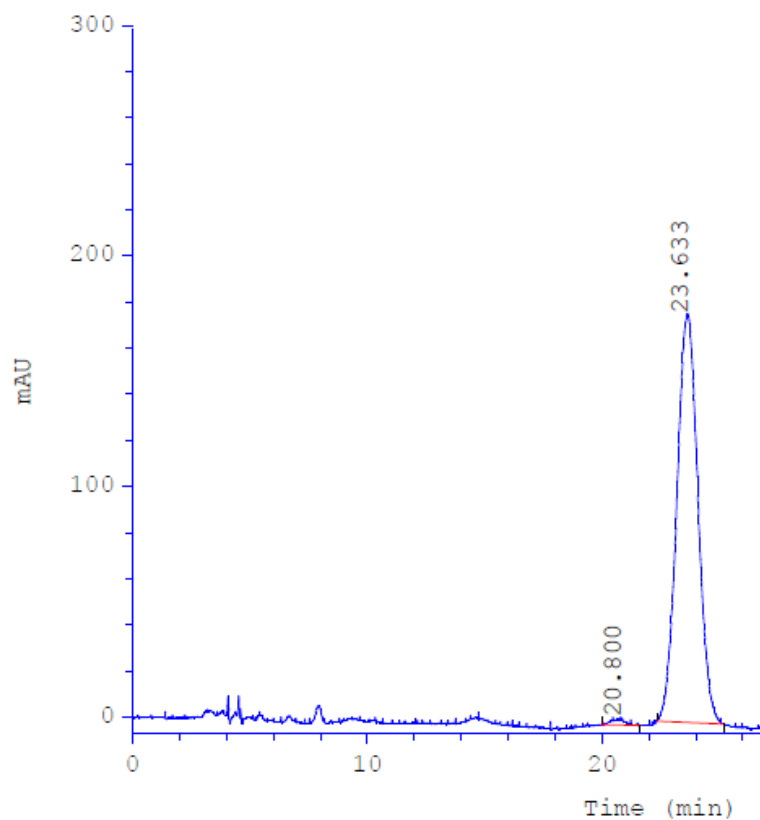

|   | Ret.time<br>[min] | Start<br>[min] | End<br>[min] | Compound | Amount | Units | Area<br>[mAU*min] | Height<br>[mAU] | % Area  | Width<br>[min] | Type |
|---|-------------------|----------------|--------------|----------|--------|-------|-------------------|-----------------|---------|----------------|------|
| 1 | 20.800            | 19.99          | 21.64        |          | -1     |       | 1.80569           | 3.58028         | 0.9704  | 0.379          | BB+  |
| 2 | 23.633            | 22.34          | 25.19        |          | -1     |       | 184.278           | 177.316         | 99.0296 | 0.956          | BB+  |

**(*R*)-3-(hydroxy(4-nitrophenyl)methyl)but-3-en-2-one 11**

*ee* (96%) determined by HPLC analysis: Chiralcel OD-H column, Hexane : *i*PrOH = 90:10, flow = 1.0 mL/min, retention times (min): 23.42 (major), 25.99 (minor).

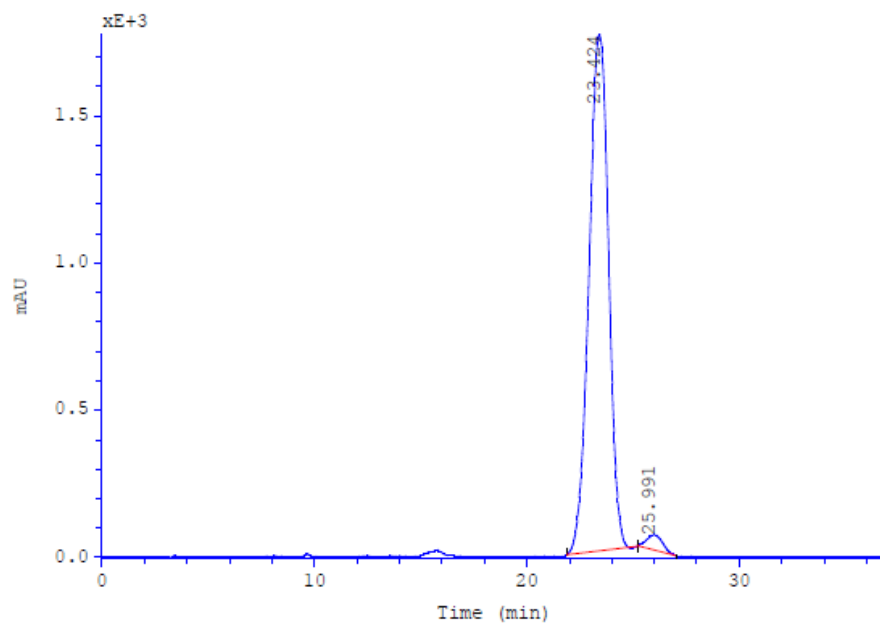

|   | Ret.time<br>[min] | Start<br>[min] | End<br>[min] | Compound | Amount | Units | Area<br>[mAU*min] | Height<br>[mAU] | % Area  | Width<br>[min] | Type |
|---|-------------------|----------------|--------------|----------|--------|-------|-------------------|-----------------|---------|----------------|------|
| 1 | 23.424            | 21.88          | 25.21        |          | -1     |       | 1871.1            | 1754.46         | 97.7295 | 1.002          | BB+  |
| 2 | 25.991            | 25.25          | 27.02        |          | -1     |       | 43.4701           | 50.615          | 2.2705  | 0.851          | BB+  |

### (S)-3-(hydroxyphenyl)methyl)but-3-en-2-one 12

*ee* (97%) determined by HPLC analysis: Chiralcel OD-H column, Hexane : *i*PrOH = 90:10, flow = 1.0 mL/min, retention times (min): 20.60 (minor), 24.37 (major).

### Racemic

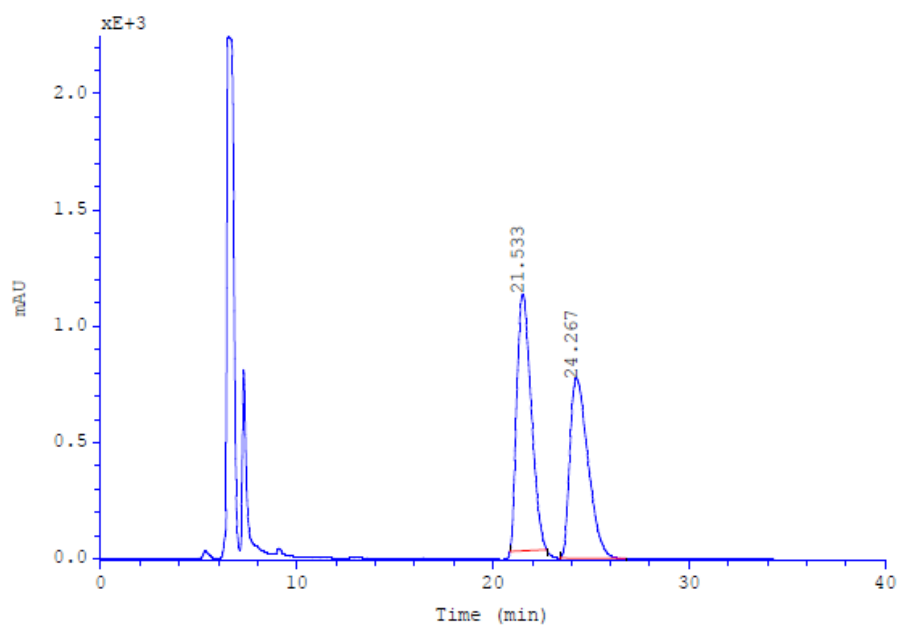

|   | Ret.time<br>[min] | Start<br>[min] | End<br>[min] | Compound | Amount | Units | Area<br>[mAU*min] | Height<br>[mAU] | % Area  | Width<br>[min] | Type |
|---|-------------------|----------------|--------------|----------|--------|-------|-------------------|-----------------|---------|----------------|------|
| 1 | 21.533            | 20.88          | 22.75        |          | -1     |       | 933.999           | 1100.93         | 52.9000 | 0.819          | BB+  |
| 2 | 24.267            | 23.41          | 26.79        |          | -1     |       | 831.596           | 772.197         | 47.1000 | 1.015          | BB+  |

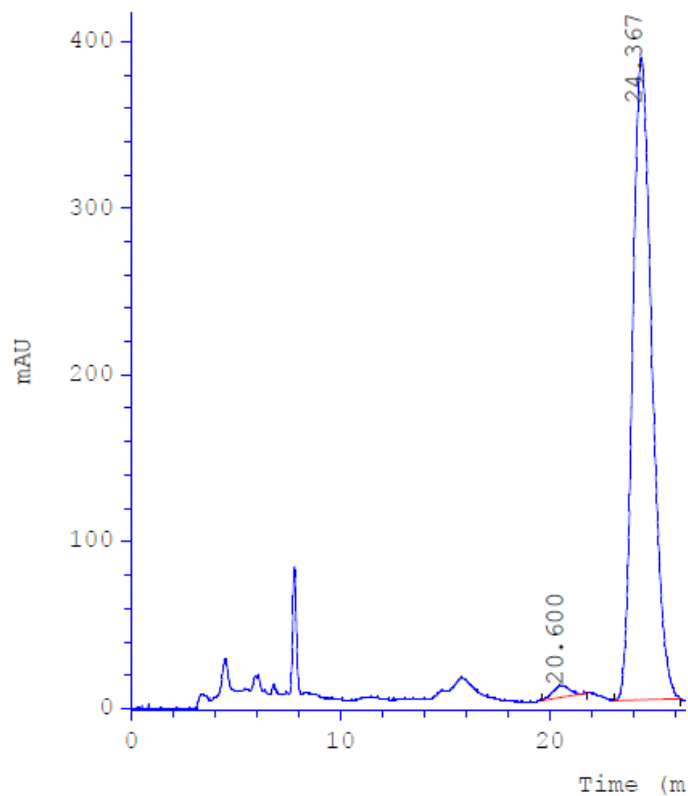

|   | Ret.time<br>[min] | Start<br>[min] | End<br>[min] | Compound | Amount | Units | Area<br>[mAU*min] | Height<br>[mAU] | % Area  | Width<br>[min] | Type |
|---|-------------------|----------------|--------------|----------|--------|-------|-------------------|-----------------|---------|----------------|------|
| 1 | 20.600            | 19.65          | 21.82        |          | -1     |       | 6.36259           | 7.07424         | 1.5258  | 0.789          | BB+  |
| 2 | 24.367            | 23.10          | 26.27        |          | 0      |       | 410.627           | 385.269         | 98.4742 | 0.989          | BB   |

### (S)-3-(hydroxy(naphthalene-2-yl)methyl)but-3-en-2-one 13

*ee* (96%) determined by HPLC analysis: Chiralcel OD-H column, Hexane : *i*PrOH = 90:10, flow = 1.0 mL/min, retention times (min): 20.52 (minor), 23.13 (major).



## Racemic

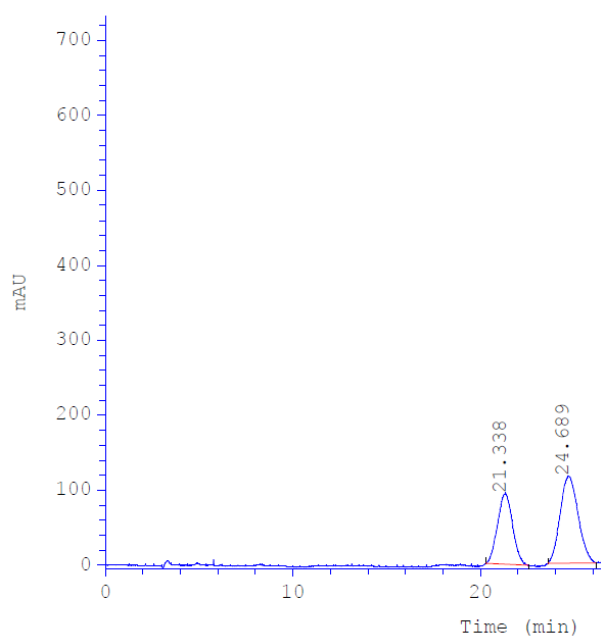

|   | Ret.time<br>[min] | Start<br>[min] | End<br>[min] | Compound | Amount | Units | Area<br>[mAU*min] | Height<br>[mAU] | % Area  | Width<br>[min] | Type |
|---|-------------------|----------------|--------------|----------|--------|-------|-------------------|-----------------|---------|----------------|------|
| 1 | 21.338            | 20.30          | 22.56        |          | -1     |       | 87.7749           | 95.3792         | 40.4195 | 0.877          | BB+  |
| 2 | 24.689            | 23.59          | 26.15        |          | -1     |       | 129.385           | 116.258         | 59.5805 | 1.043          | BB+  |

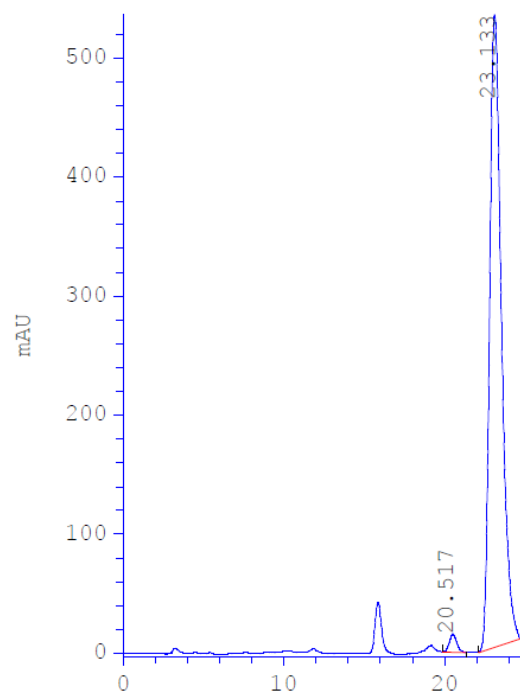

|   | Ret.time<br>[min] | Start<br>[min] | End<br>[min] | Compound | Amount | Units | Area<br>[mAU*min] | Height<br>[mAU] | % Area  | Width<br>[min] | Type |
|---|-------------------|----------------|--------------|----------|--------|-------|-------------------|-----------------|---------|----------------|------|
| 1 | 20.517            | 19.87          | 21.40        |          | 0      |       | 8.25118           | 15.4123         | 1.8084  | 0.497          | BB   |
| 2 | 23.133            | 22.13          | 24.80        |          | 0      |       | 448.007           | 531.29          | 98.1916 | 0.751          | BB   |

**(S)-3-(hydroxy(4-fluorophenyl)methyl)but-3-en-2-one 14**

*ee* (82%) determined by HPLC analysis: Chiralcel OD-H column, Hexane : *i*PrOH = 90:10, flow = 1.0 mL/min, retention times (min): 18.47 (minor), 22.98 (major).

**Racemic**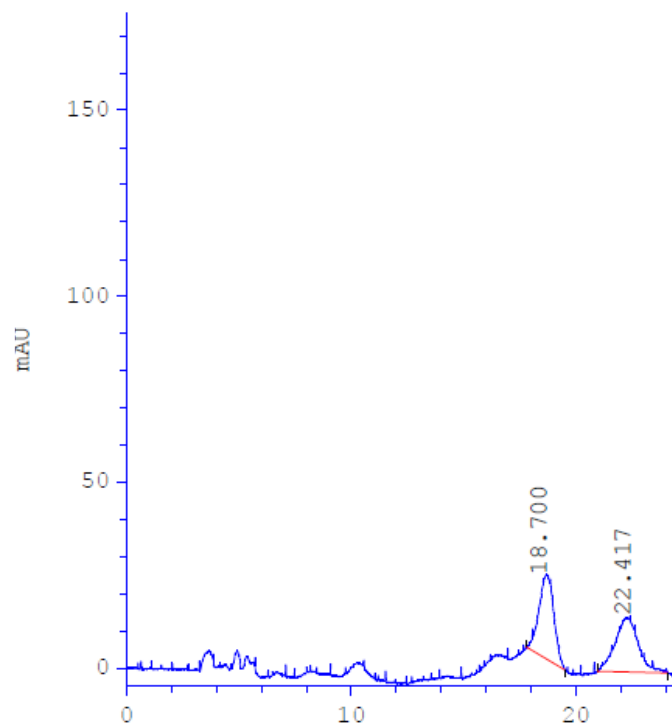

|   | Ret.time<br>[min] | Start<br>[min] | End<br>[min] | Compound | Amount | Units | Area<br>[mAU*min] | Height<br>[mAU] | % Area  | Width<br>[min] | Type |
|---|-------------------|----------------|--------------|----------|--------|-------|-------------------|-----------------|---------|----------------|------|
| 1 | 18.700            | 17.84          | 19.54        |          | -1     |       | 17.5134           | 22.6649         | 49.8587 | 0.720          | BB+  |
| 2 | 22.417            | 20.99          | 24.09        |          | -1     |       | 17.6127           | 15.2256         | 50.1414 | 1.045          | BB+  |

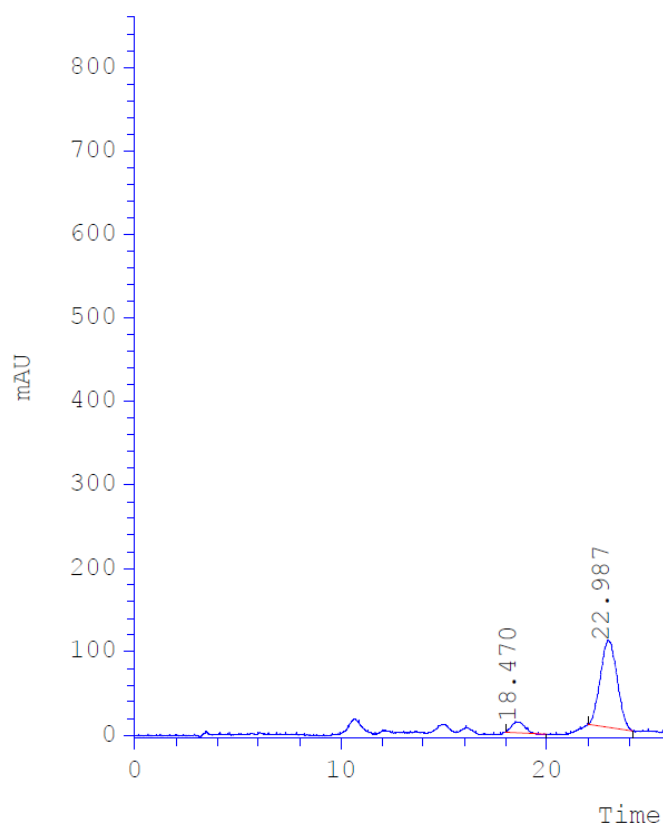

|   | Ret.time<br>[min] | Start<br>[min] | End<br>[min] | Compound | Amount | Units | Area<br>[mAU*min] | Height<br>[mAU] | % Area  | Width<br>[min] | Type |
|---|-------------------|----------------|--------------|----------|--------|-------|-------------------|-----------------|---------|----------------|------|
| 1 | 18.470            | 17.99          | 19.98        |          | -1     |       | 9.62815           | 13.7258         | 8.9008  | 0.727          | BB+  |
| 2 | 22.987            | 22.02          | 24.19        |          | 0      |       | 98.5435           | 104.034         | 91.0992 | 0.909          | BB   |

**(S)-3-(hydroxy(4-bromophenyl)methyl)but-3-en-2-one 15**

*ee* (98%) determined by HPLC analysis: Chiralcel OD-H column, Hexane : *i*PrOH = 90:10, flow = 1.0 mL/min, retention times (min): 18.12 (minor), 22.67 (major).

# Racemic

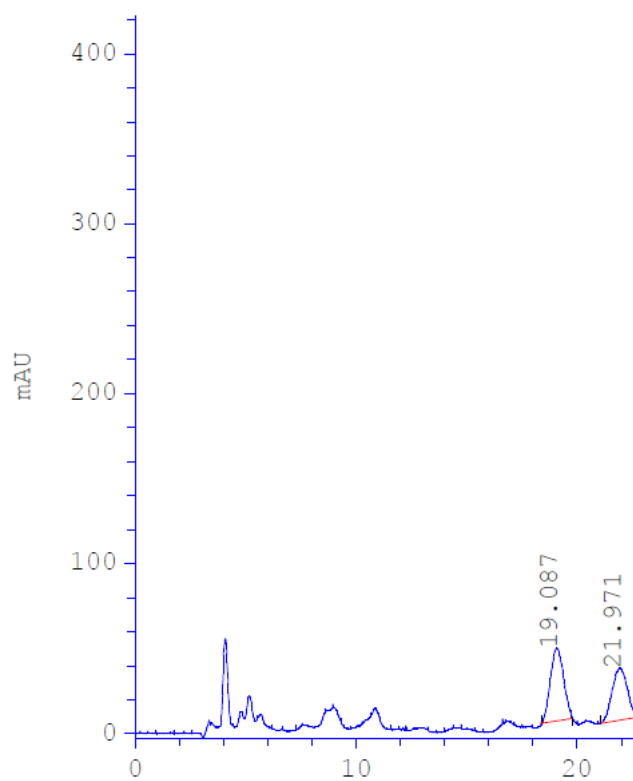

|   | Ret.time<br>[min] | Start<br>[min] | End<br>[min] | Compound | Amount | Units | Area<br>[mAU*min] | Height<br>[mAU] | % Area  | Width<br>[min] | Type |
|---|-------------------|----------------|--------------|----------|--------|-------|-------------------|-----------------|---------|----------------|------|
| 1 | 19.087            | 18.38          | 19.80        |          | -1     |       | 30.181            | 43.3392         | 55.7563 | 0.672          | BB+  |
| 2 | 21.971            | 21.09          | 22.72        |          | 0      |       | 23.9492           | 30.343          | 44.2437 | 0.765          | BB   |

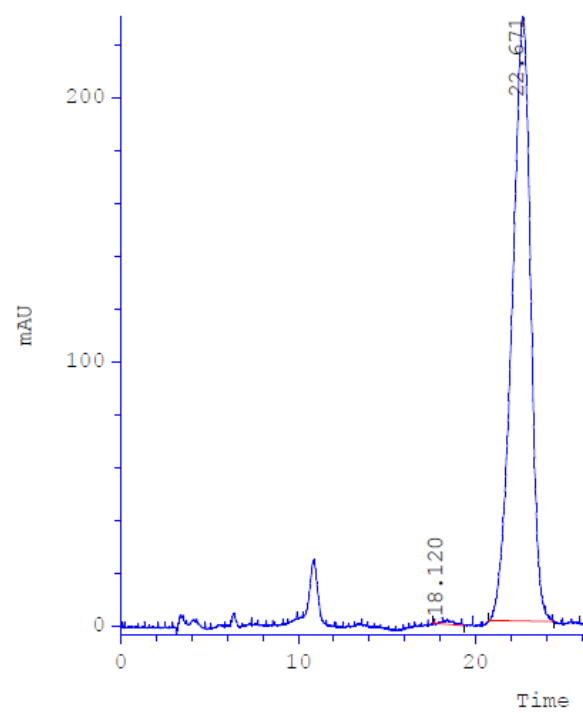

|   | Ret.time<br>[min] | Start<br>[min] | End<br>[min] | Compound | Amount | Units | Area<br>[mAU*min] | Height<br>[mAU] | % Area  | Width<br>[min] | Type |
|---|-------------------|----------------|--------------|----------|--------|-------|-------------------|-----------------|---------|----------------|------|
| 1 | 18.120            | 17.61          | 19.35        |          | -1     |       | 1.49706           | 2.81402         | 0.5387  | 0.464          | BB+  |
| 2 | 22.671            | 20.74          | 24.40        |          | -1     |       | 276.407           | 228.727         | 99.4613 | 1.120          | BB+  |

### Methyl (*S*)-2-(hydroxy(4-nitrophenyl)methyl) acrylate **17**

*ee* (74%) determined by HPLC analysis: Chiralcel OD-H column, Hexane : *i*PrOH = 90:10, flow = 1.0 mL/min, retention times (min): 18.22 (minor), 21.40 (major).

#### Racemic

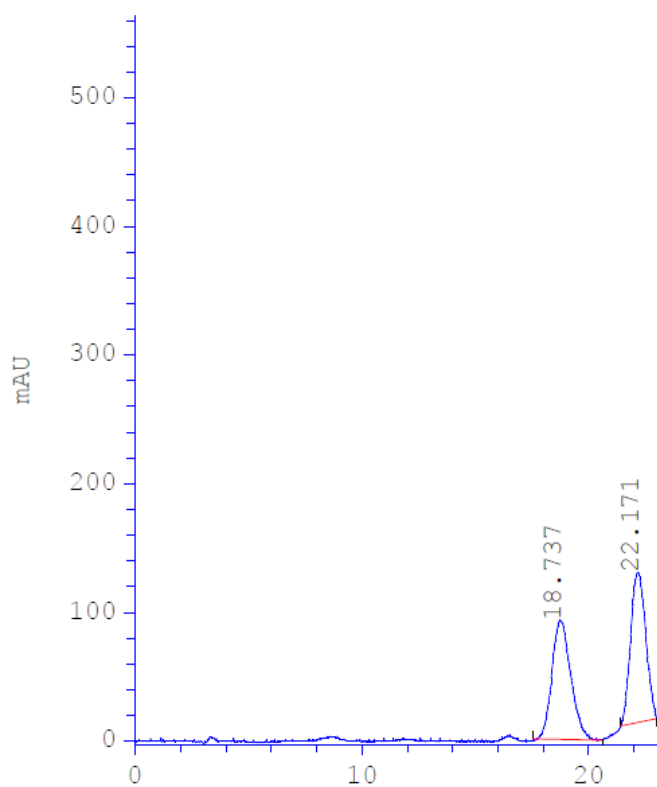

|   | Ret.time<br>[min] | Start<br>[min] | End<br>[min] | Compound | Amount | Units | Area<br>[mAU*min] | Height<br>[mAU] | % Area  | Width<br>[min] | Type |
|---|-------------------|----------------|--------------|----------|--------|-------|-------------------|-----------------|---------|----------------|------|
| 1 | 18.737            | 17.55          | 20.60        |          | -1     |       | 88.8175           | 92.4384         | 49.7975 | 0.908          | BB+  |
| 2 | 22.171            | 21.40          | 23.00        |          | -1     |       | 89.5399           | 116.547         | 50.2025 | 0.734          | BB+  |

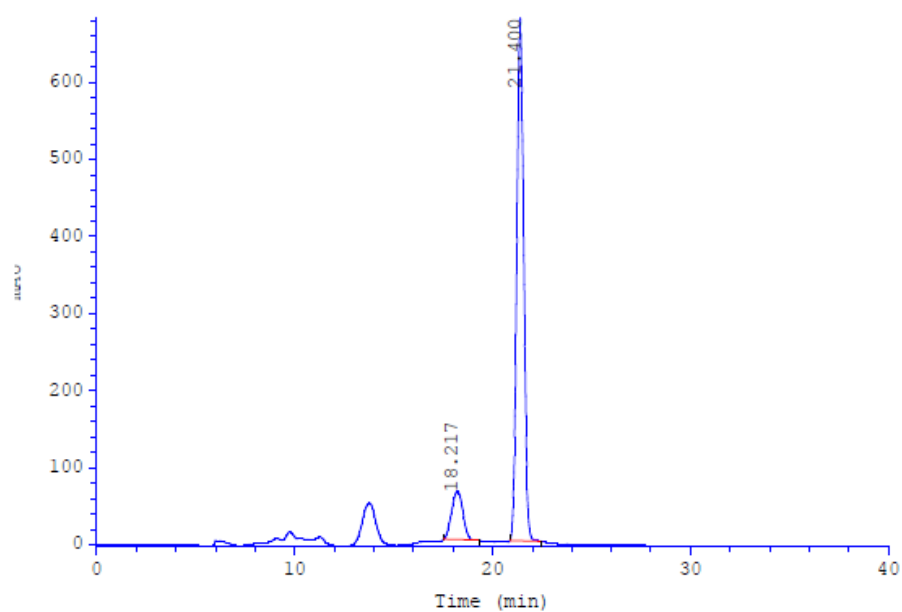

|   | Ret.time<br>[min] | Start<br>[min] | End<br>[min] | Compound | Amount | Units | Area<br>[mAU*min] | Height<br>[mAU] | % Area  | Width<br>[min] | Type |
|---|-------------------|----------------|--------------|----------|--------|-------|-------------------|-----------------|---------|----------------|------|
| 1 | 18.217            | 17.54          | 19.32        |          | -1     |       | 41.4139           | 62.4659         | 13.0727 | 0.644          | BB+  |
| 2 | 21.400            | 20.88          | 22.48        |          | -1     |       | 275.383           | 678.664         | 86.9273 | 0.384          | BB+  |
